# Supplementary material for: A mild solution chemistry method to synthesize hydrotalcite-supported platinum nanocrystals for selective hydrogenation of cinnamaldehyde in neat water
Source: Royal Society of Chemistry journal article supplement (doi:10.1039/c3cy00437f), 2013-01-01
Supplement: c3cy00437f.pdf [file c3cy00437f.pdf]

## Supplementary Information

A mild solution chemistry method to hydrotalcite-supported Platinum nanocrystals for selective hydrogenation of cinnamaldehyde in neat water

*Xu Xiang\**, *Wanhong He*, *Lisha Xie*, *Feng Li*

**Table S1** Description of the synthesized catalysts and Pt loading

| Sample name | TTAB/Pt <sup>4+</sup> ratio | Pt loading % (wt) <sup>a</sup> |
|-------------|-----------------------------|--------------------------------|
| Pt/MA       | 0                           | 1.97                           |
| Pt/MA-1     | 25: 1                       | 1.96                           |
| Pt/MA-2     | 50: 1                       | 1.96                           |
| Pt/MA-3     | 100: 1                      | 1.97                           |

<sup>a</sup> As determined by ICP

**Table S2** The effect of solvents on catalytic performance over the Pt catalyst<sup>a</sup>

| Solvent     | TOF (s <sup>-1</sup> ) <sup>b</sup> | Conversion% | Selectivity % <sup>c</sup> |      |      |                     |
|-------------|-------------------------------------|-------------|----------------------------|------|------|---------------------|
|             |                                     |             | CMO                        | HCMA | HCMO | Others <sup>d</sup> |
| Water       | 0.488                               | 79.7        | 85.4                       | 13.3 | 1.0  | 0.3                 |
| Ethanol     | 0.600                               | 84.7        | 91.2                       | 1.3  | 2.2  | 5.3                 |
| Isopropanol | 0.593                               | 80.6        | 88.4                       | 4.7  | 2.0  | 4.9                 |
| Cyclohexane | 0.139                               | 25          | 43.8                       | 41.4 | 10.6 | 4.2                 |

<sup>a</sup> Pt/MA-1. <sup>b</sup> TOF was calculated at CAL conversion of approximately 10%. <sup>c</sup> Selectivity was reported at the level of conversion in the table. <sup>d</sup> Other products mainly include acetals. Reaction conditions: 0.05 g catalyst, substrate: 4 mmol CMA, solvent: 15 mL, H<sub>2</sub> pressure: 1.0 MPa, temperature: 333 K, reaction time: 2 h.

**Table S3** The polarity and H<sub>2</sub> solubility in different solvents <sup>1</sup>

| Solvent     | Polarity | H <sub>2</sub> solubility <sup>a</sup> / $\mu\text{mol cm}^{-3}$ |
|-------------|----------|------------------------------------------------------------------|
| Water       | 23.4     | 0.80                                                             |
| Ethanol     | 12.9     | 3.59                                                             |
| Isopropanal | 11.5     | 3.90                                                             |
| Cyclohexane | 0.2      | 3.72                                                             |

<sup>a</sup> The H<sub>2</sub> solubility ( $c_L$ ) is related to the Bunsen coefficient ( $a$ ) by  $c_L = a/v_0$ , where  $v_0$  is the molar volume of the gas in  $\text{cm}^3 \text{mol}^{-1}$  at 273.15 K,  $a$  is calculated at 293.15 K and 101.325 kPa partial pressure of the gas.

**Table S4** Citral hydrogenation over the supported Pt catalyst <sup>a</sup>

| Temp (K) | Conversion% | geraniol (C=O) | Selectivity % <sup>b</sup> |                       |
|----------|-------------|----------------|----------------------------|-----------------------|
|          |             |                | citronellal (C=C)          | citronellol (C=C-C=O) |
| 373      | 96.3        | 12.8           | 1.4                        | 84.2                  |
| 353      | 95.0        | 38.9           | 2.5                        | 49.9                  |
| 333      | 91.5        | 70.5           | 3.1                        | 20.3                  |

<sup>a</sup> Catalyst: Pt/MA-1. <sup>b</sup> Selectivity was reported at the level of conversion in the table. Reaction conditions: 0.05 g catalyst, substrate: 2.9 mmol citral, solvent: 15 mL water, H<sub>2</sub> pressure: 1.0 MPa, reaction time: 2 h.

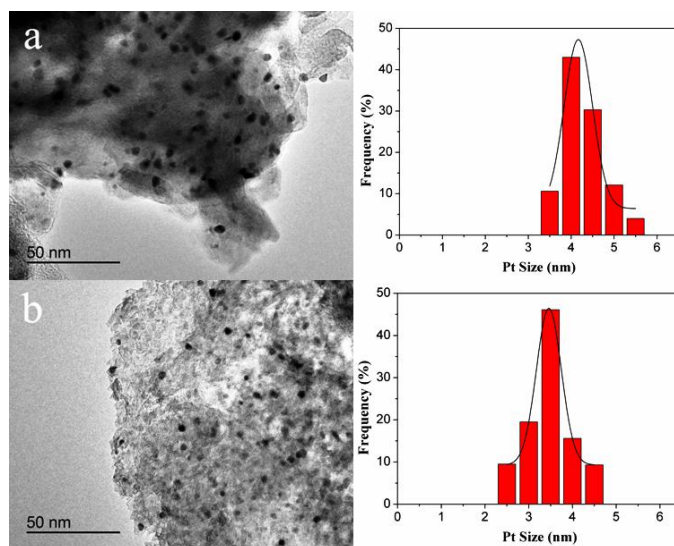

**Figure S1** TEM photographs of the supported Pt catalysts with reduced Pt loadings

(a) 0.96 wt% Pt, (b) 0.47 wt% Pt. Pt size distribution histograms were shown in the right column.

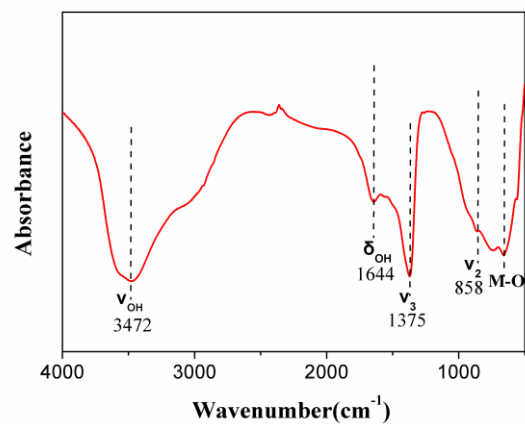

**Figure S2** FTIR spectra of the supported Pt catalyst (Pt/MA-1) after use

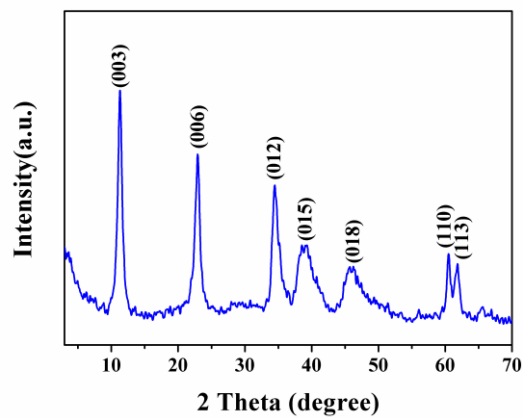

**Figure S3** XRD pattern of supported Pt catalyst (Pt/MA-1) after use

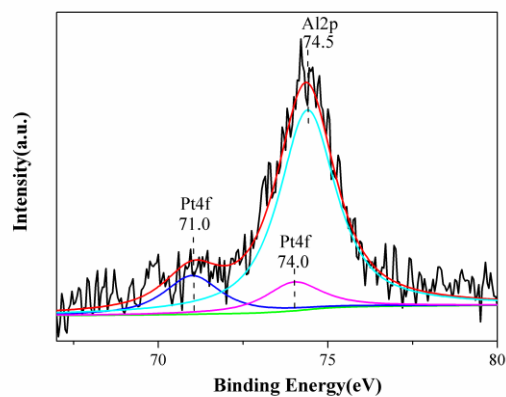

**Figure S4** XPS spectra of Pt4f core level in the catalyst (Pt/MA-1) after use

## References

- 1 C. L. Young, Hydrogen and Deuterium, Pergamon, Solubility data series, 1981, Volume 5/6.
